# Supplementary material for: Single step in situ formation of porous zinc oxide/PMMA nanocomposites by pulsed laser irradiation: kinetic aspects and mechanisms
Source: Royal Society of Chemistry journal article supplement (doi:10.1039/c5ra23125f), 2016-01-01
Supplement: c5ra23125f1.pdf [file c5ra23125f1.pdf]

## Single step *in situ* formation of porous Zinc Oxide/PMMA nanocomposites by pulsed laser irradiation: kinetic aspects and mechanisms

Davide Morselli,<sup>a</sup> Alice Scarpellini,<sup>b</sup> Athanassia Athanassiou<sup>a</sup> and Despina Fragouli<sup>a</sup>

<sup>a</sup> Smart Materials, Istituto Italiano di Tecnologia, Via Morego 30, 16163 Genova, Italy

<sup>b</sup> Electron Microscopy Laboratory, Nanochemistry, Istituto Italiano di Tecnologia, Via Morego 30, 16163 Genova, Italy

### Supporting Information

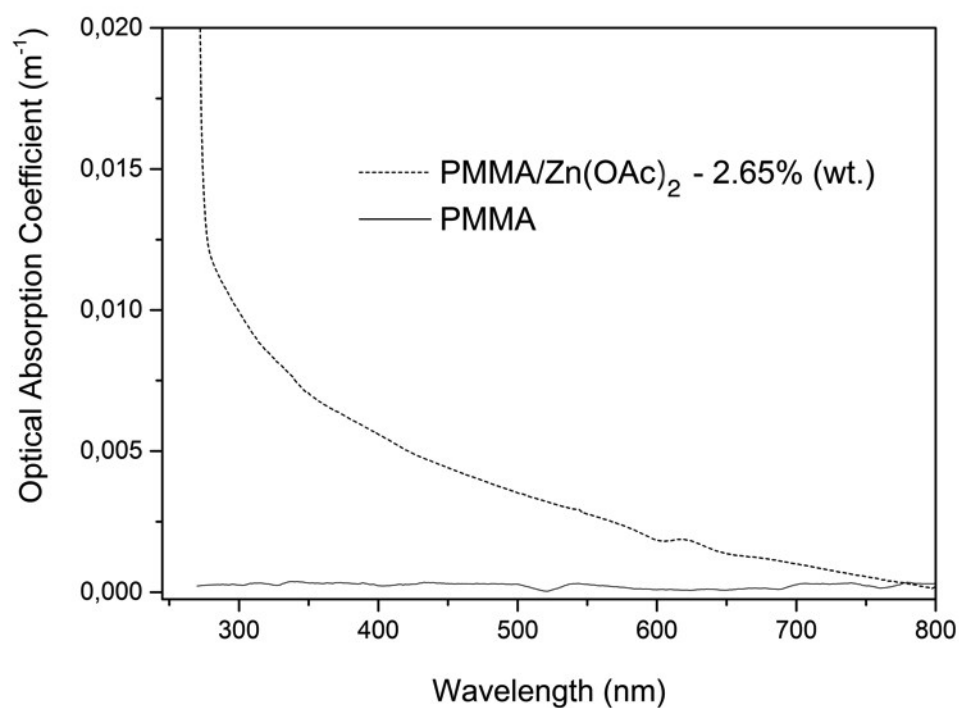

**Figure S1** UV-visible absorption spectra of neat PMMA film and PMMA/Zn(OAc)<sub>2</sub> film before the irradiation.

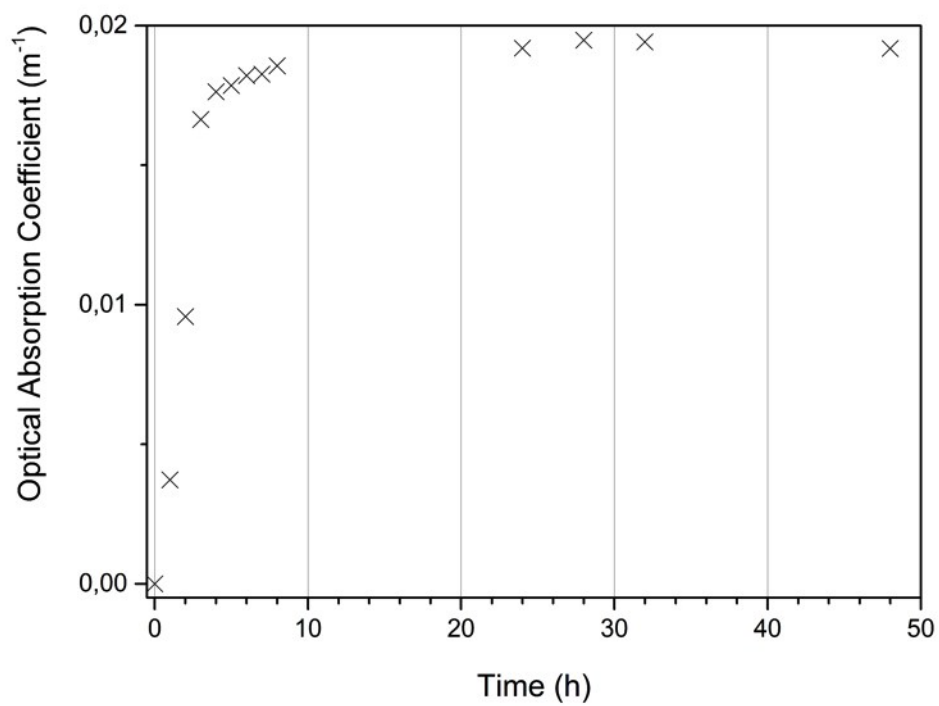

**Figure S2** Kinetics of ZnO nanoparticles synthesis by thermal activation at 110°C and as a function of the time.

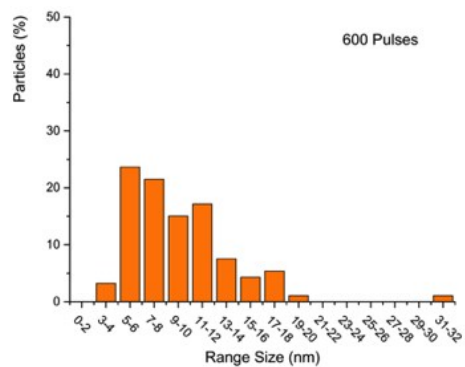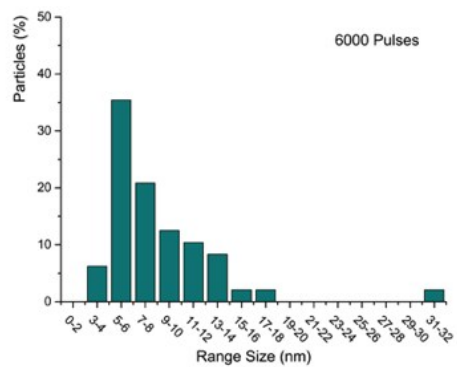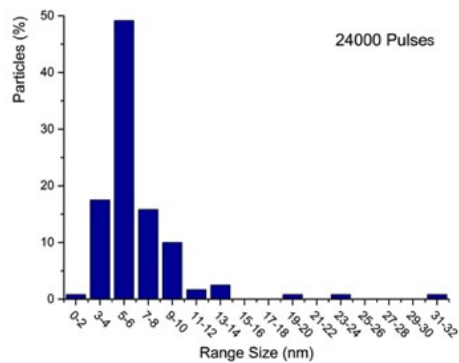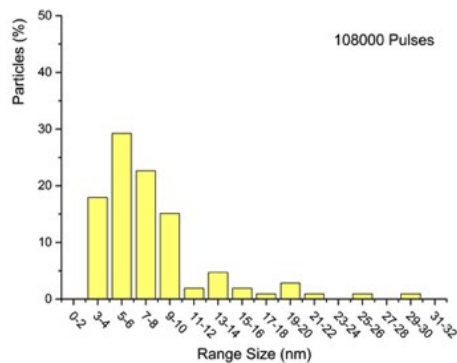

**Figure S3** Particles size distributions, for samples irradiated with different number of pulses, obtained by TEM images analysis.

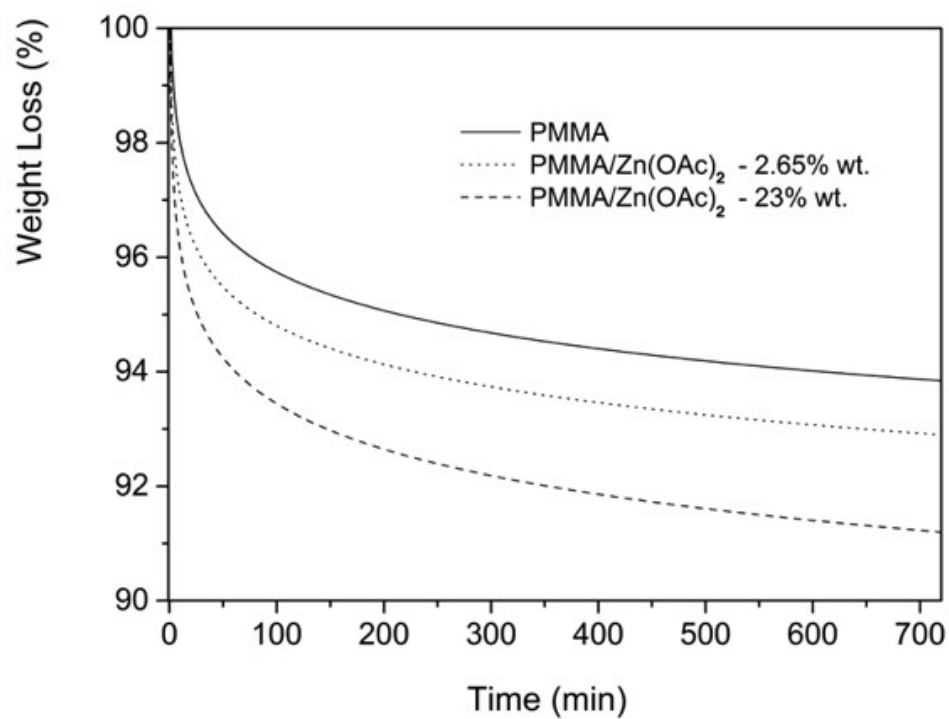

**Figure S4** Thermo-gravimetric analyses of neat PMMA and PMMA/Zn(OAc)<sub>2</sub> with a content of 2.65 wt.% and 23 wt.%, respectively.
